# The American Journal of Psychiatry

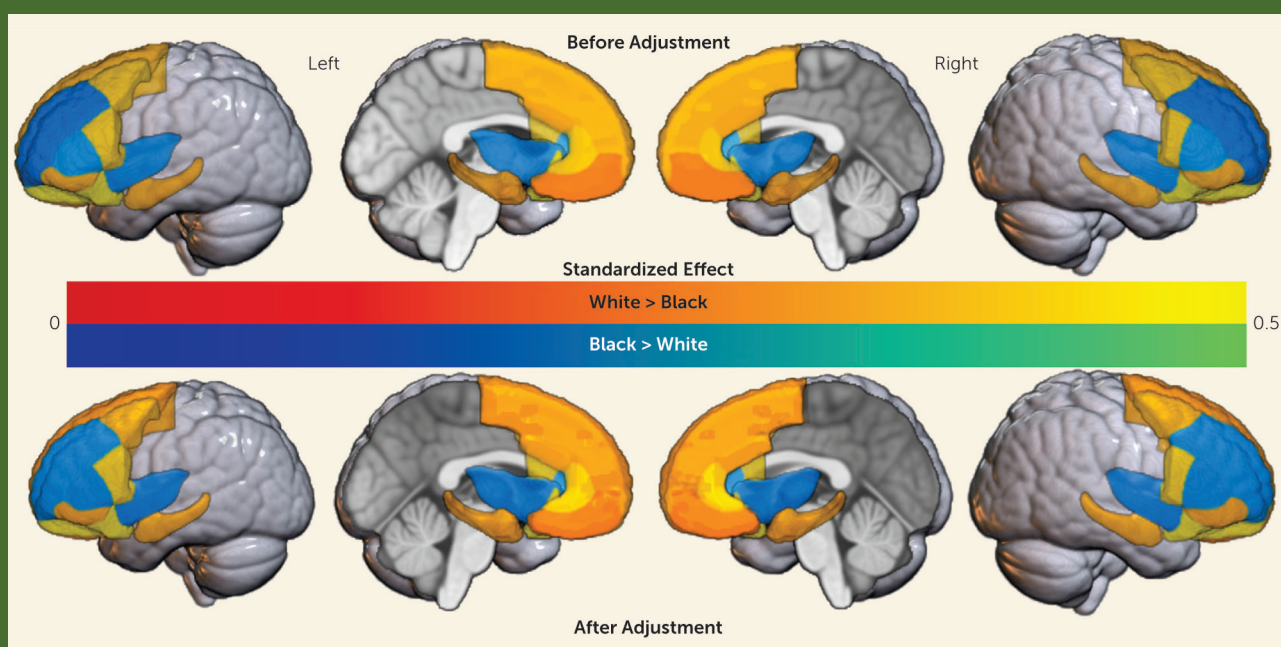

Racial Disparities in Adversity During Childhood and the False  
Appearance of Race-Related Differences in Brain Structure

Childhood Maltreatment and Mental Health Problems: A Systematic  
Review and Meta-Analysis of Quasi-Experimental Studies

Polygenic Risk and Social Support in Predicting  
Depression Under Stress

Evaluating the Evidence for Brain-Based Biotypes of  
Psychiatric Vulnerability in the Acute Aftermath of Trauma
