# TMS Therapy Was Searched Online Thousands of Times in the Last Month.

## Be ready when patients ask you about it.

Patients and their families are savvy consumers. Just like you, they research ways to solve their problems. And when antidepressants don't work, they search for alternative therapies. Be ready to say yes when they ask you if you provide TMS.

MagVenture Transcranial Magnetic Stimulation (TMS) for Major Depressive Disorder<sup>1</sup>:

- ✓ Delivers a 49% response rate and 32% remission rate\* for MDD after failure of two or more antidepressants<sup>2</sup>
- ✓ Reimbursed by most insurance companies
- ✓ NO per-use treatment fees back to the manufacturer
- ✓ Non-invasive, no anesthesia, and does not affect cognitive function
- ✓ Safe technique: most common side effects include mild discomfort and transient headache
- ✓ Can pay for itself with just ONE patient per month<sup>3</sup>

Scan to get in touch:

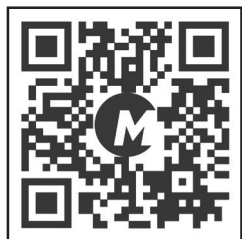

Our systems are used at prolific and highly showcased TMS services across the U.S. Let's get one in your practice.

1. MagVenture Transcranial Magnetic Stimulation (TMS) Therapy is indicated for the treatment of major depressive disorder (MDD) in adult patients who have failed to receive satisfactory improvement from prior antidepressant medication in the current episode.

2. Blumberger DM, Vila-Rodriguez F, Thorpe KE, et al. *Lancet*. 2018 Apr 28;391(10131):1683-1692.

3. Assuming 60-month financing, a monthly payment of \$2,000, and reimbursement at \$115 per session. Standard 36-session depression protocol.

\* The response rate is defined by a  $\geq 50\%$  reduction from baseline of depressive symptoms on the HRSD-17 scale.

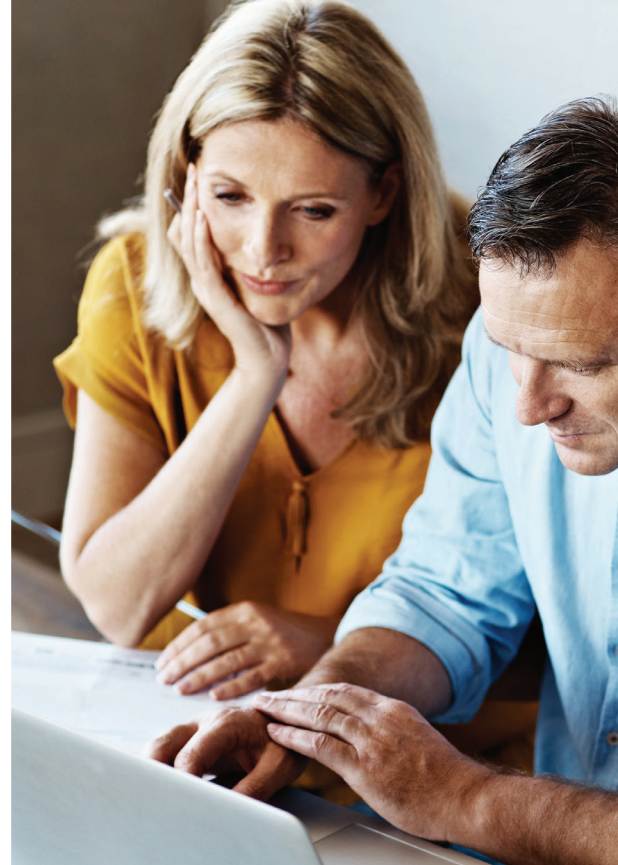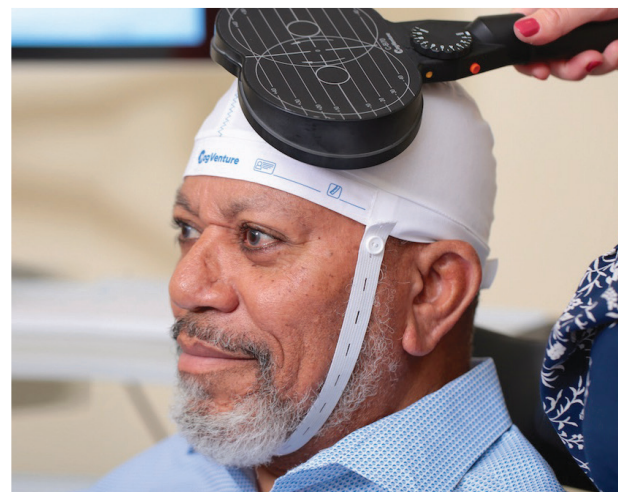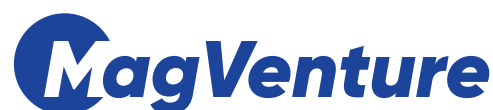

# ▶ PODCASTS from APA Publishing

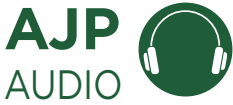

## AJP Audio

Host: Aaron van Dorn

Each episode features an in-depth interview with authors featured in that month's issue of *The American Journal of Psychiatry*.

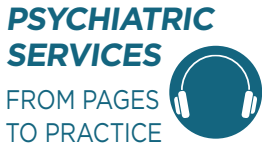

## Psychiatric Services From Pages to Practice

Hosts: Lisa Dixon, M.D., M.P.H., Editor, *Psychiatric Services*, and Josh Berezin, M.D., M.S.

Learn about the latest mental health services research published in *Psychiatric Services* and why it is relevant. Topics include community-based treatment programs, collaborative care, evidence-based treatment and service delivery, criminal and social justice, policy analysis, and more.

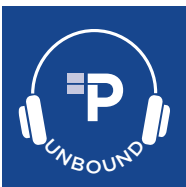

## Psychiatry Unbound

Host: Laura Roberts, M.D., M.A., Editor-in-Chief, APA Publishing Books

APA Publishing's Books podcast offers the opportunity to hear the voices behind the most prominent psychiatric scholarship in the field today. Learn about important topics in the field of psychiatry and see how our authors are making an impact in clinical settings throughout the world.

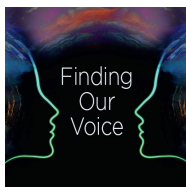

## Finding Our Voice

Host: Sanya Virani, MBBS, MPH

*Finding Our Voice* brings the viewpoints and opinions of the next generation of psychiatrists—including residents, fellows, and early career psychiatrists—to the forefront. Topics covered include systemic racism and social determinants.

Subscribe Today!

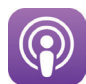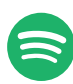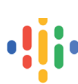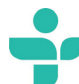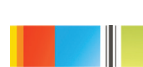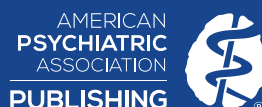

## Enable Psychiatric News Brief

With the American Psychiatric Association's new flash briefing, *Psychiatric News Brief*, you can now listen to synopses of curated articles from *Psychiatric News*. Simply enable this skill and you can listen anytime you choose throughout your day by just saying "Alexa, what's my flash briefing" or "Alexa, tell me what's new".

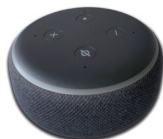

Flash briefing is a customizable Amazon skill that includes updates from your favorite content services. When you say, "Alexa, what's my flash briefing?" or "Alexa, what's the news," you'll hear updates from any organization that you have enabled.

Go to [psychnews.psychiatryonline.org/alexa](https://psychnews.psychiatryonline.org/alexa) to sign up now!

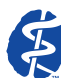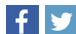

## Seeking Value

### Balancing Cost and Quality in Psychiatric Care

Edited by Wesley E. Sowers, M.D.,  
and Jules M. Ranz, M.D. Group for  
the Advancement of Psychiatry

#### *Seeking Value: Balancing Cost and Quality in Psychiatric*

*Care*, a comprehensive volume by the Group for the Advancement of Psychiatry's Mental Health Services Committee, examines the myriad factors that have led to the current state of health care in the United States—starting with an analysis of the meaning and history of value measurement—but it does not stop there. It offers a holistic vision for health care reform, one in which psychiatric professionals play a pivotal role.

2021 • 643 pages • ISBN 978-0-87318-225-6  
Hardcover • \$85.00 • Item #7225

2021 • 643 pages • ISBN 978-0-87318-226-3  
eBook • \$68.00 • Item #7226

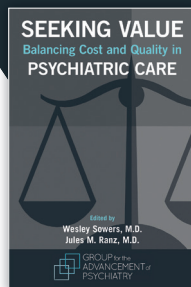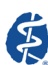

## HOSPITAL EMPLOYED PSYCHIATRY OPPORTUNITIES IN NEW HAMPSHIRE

Portsmouth Regional Hospital, Parkland Medical Center and Frisbie Memorial Hospital are seeking BC/BE Psychiatrists to join their HCA employed practices in New Hampshire. HCA is one of the nation's leading providers of healthcare services. You will work with a supportive and energetic multi-disciplinary team that employs creativity and compassion in their work with patients, families and caregivers.

### Opportunities Available:

- **GME Consult Liaison**—Portsmouth, NH— Clinical/ Teaching Opportunity; Serve as a consult liaison for Portsmouth Regional Hospital (PRH) Emergency Department as well as teaching psychiatry residents on CL/ED rotation at PRH. Available academic appointment at Tufts University. Monday-Friday work schedule, **no weekend call**.
- **Psychiatrist** – Derry NH –Hospitalist for Parkland Medical Center's Behavioral Health Unit, as well as covering the Partial Hospitalization Program and Eating Disorders Treatment Center. *Flexible shifts; generous hourly pay; and flexible call rotation.*
- **Adult & Geriatric Psychiatrist** – Rochester, NH – Adult and Geriatric Psychiatric for Frisbie Memorial Hospital's employed practice. Can provide both inpatient and outpatient care. Geriatric fellowship preferred: ECT therapy a plus! Mon-Fri work schedule; and flexible call rotation.

### Qualified Candidates:

- Completion of an accredited residency program in Psychiatry
- Certified / Re-Certified (if applicable) by the American Board of Psychiatry
- Excellent interpersonal and communication skills

### Incentive/Benefits Package:

- Competitive compensation with occurrence-based malpractice with tail coverage
- Comprehensive benefits package including commencement bonus; CME monies and time
- Faculty appointment to Tufts University School of Medicine is available

**Portsmouth Regional Hospital** is a 220-bed acute care facility with a Level II Trauma Center; 24/7 full-service ER; dedicated Hospitalist and Intensivist program. The inpatient psychiatric unit is a 30-beds, this includes 16 involuntary beds. Portsmouth Regional is home to our Psychiatry Residency Program which was initiated in summer 2021.

To learn more about us and to share your professional interests, please contact Char Plotycia, Physician Recruiter, at 913-558-2469 or [charlene.plotycia@hcahealthcare.com](mailto:charlene.plotycia@hcahealthcare.com).



Searching for  
the perfect  
psychiatric  
career?

## Let APA JobCentral help!

### Manage Your Career

- Browse hundreds of active job listings!
- Create an account to save jobs, store multiple resumes and cover letters and communicate with employers through our internal messaging system.
- Set up multiple job alerts specifying your skills, interests and location to receive e-mails when employers post jobs that match your criteria.

### Recruit for Open Positions

- Post your job in front of thousands of highly qualified psychiatrists.
- Cross promote your job listing in Psychiatric News.
- Search the anonymous resume database to find your ideal candidate.

AMERICAN  
PSYCHIATRIC  
ASSOCIATION

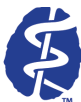

**JOBCENTRAL**  
The Career Hub for Psychiatry

[jobs.psychiatry.org](https://jobs.psychiatry.org)

# THE AMERICAN PSYCHIATRIC ASSOCIATION

800 Maine Avenue, S.W., Suite 900, Washington, D.C. 20024

(888) 357-7924 (toll-free inside the U.S. and Canada)

web site: [www.psychiatry.org](http://www.psychiatry.org) • e-mail: [apa@psych.org](mailto:apa@psych.org)

## Chairpersons of Councils, Committees, and Task Forces

### Standing Committees

|                             |                              |
|-----------------------------|------------------------------|
| <b>Bylaws</b>               | Edward R. Herman, J.D., M.D. |
| <b>Elections</b>            | Josepha A. Cheong, M.D.      |
| <b>Ethics</b>               | Charles Dike, M.D.           |
| <b>Finance and Budget</b>   | Ann T. Sullivan, M.D.        |
| <i>Audit</i>                | Richard F. Summers, M.D.     |
| <i>Investment Oversight</i> | Steven S. Sharfstein, M.D.   |
| <b>Joint Reference</b>      | Petros Levounis, M.D., M.A.  |
| <b>Membership</b>           | Gail Robinson, M.D.          |
| <b>Nominating</b>           | Vivian B. Pender, M.D.       |
| <b>Tellers</b>              | Mariam F. Aboukar, D.O.      |

### Non-Standing Committee

|                             |                               |
|-----------------------------|-------------------------------|
| <b>Conflict of Interest</b> | Sandra M. DeJong, M.D., M.Sc. |
|-----------------------------|-------------------------------|

### Councils

#### Council on Addiction Psychiatry

Smita Das, M.D., M.P.H., Ph.D.

#### Council on Advocacy and Government Relations

Katherine G. Kennedy, M.D.

*Advocacy and Litigation Funding*

Patrick Aquino, M.D.

#### Council on Children, Adolescents, and Their Families

Anish R. Dube, M.D., M.P.H.

*Women's Mental Health*

Ludmila B. De Faria, M.D.

#### Council on Communications

Howard Liu, M.D., M.B.A.

#### Council on Consultation-Liaison Psychiatry

Maria L. Tiamson-Kassab, M.D.

#### Council on Geriatric Psychiatry

Maria D. Llorente, M.D.

#### Council on Healthcare Systems and Financing

Robert L. Trestman, M.D., Ph.D.

*Integrated Care*

Benjamin G. Druss, M.D.

*RBRVS, Codes and Reimbursement*

Jeremy S. Musher, M.D.

*Reimbursement for Psychiatric Care*

Brian Hepburn, M.D.

*Telepsychiatry*

Shabana Khan, M.D.

#### Council on International Psychiatry and Global Health

Pamela Collins, M.D., M.P.H.

#### Council on Medical Education and Lifelong Learning

Art Walaszek, M.D.

*Innovation*

Steven Chan, M.D., M.B.A.

*Scientific Program*

Eric Williams, M.D.

*Scientific Program—Mental Health Services Conference*

*(Oct. to Oct. tenure)*

John Santopietro, M.D.

*Vestermark Award Committee*

Donna M. Sudak, M.D.

*Well-being and Burnout*

Uchenna Okoye, M.D., M.P.H.

#### Council on Minority Mental Health and Health Disparities

Walter Wilson, Jr., M.D.

#### Council on Psychiatry and Law

Richard Martinez, M.D., M.H.

*Judicial Action*

Reena Kapoor, M.D.

#### Council on Quality Care

Carol L. Alter, M.D.

*Mental Health Information Technology*

John Torous, M.D.

*Quality and Performance Measurement*

David S. Kroll, M.D.

*Practice Guidelines*

Daniel J. Anzia, M.D.

#### Council on Research

Jonathan E. Alpert, M.D., Ph.D.

*Climate Change and Mental Health*

Elizabeth Haase, M.D.

*Psychiatric Dimensions of Disasters*

Joshua C. Morganstein, M.D.

# Go Online

Visit [ajp.psychiatryonline.org](http://ajp.psychiatryonline.org) for these features!

## AJP in Advance

*Discover the latest research advances before they appear in print*

### **Anterior Insula–Associated Social Novelty Recognition: Pivotal Roles of a Local Retinoic Acid Cascade and Oxytocin Signaling**

Anterior insula is known to be a key brain region for a wide range of psychiatric disorders, including social cognition deficits, but its mechanism is still unclear. In this study, the authors manipulated expression of Cyp26B1, an anterior insula-enriched molecule that is crucial for retinoic acid degradation and involved in the pathology of neuropsychiatric conditions, in animal models and aimed to address this question. Results show that anterior insula mediates social novelty recognition, which is regulated by a local retinoic acid cascade and oxytocin signaling.

## AJP Audio and Video

In the February 2023 episode of our AJP Audio podcast, host Aaron van Dorn welcomes Nathaniel G. Harnett, Ph.D., who discusses his team's finding that differential exposure to childhood adversity contributes to racial differences between Black American and White American children in gray matter volumes of brain regions key to emotion regulation (Dumornay et al., p. 127).

In an issue highlight video, AJP Deputy Editor Danny Pine discusses the articles "Polygenic Risk and Social Support in Predicting Depression Under Stress" (Cleary et al., p. 139) and "Evaluating the Evidence for Brain-Based Biotypes of Psychiatric Vulnerability in the Acute Aftermath of Trauma" (Ben-Zion et al., p. 146).

## AJP CME

You can earn CME credits by reading articles in *The American Journal of Psychiatry*. Three articles in this issue form a short course that consists of reading the article and answering three multiple-choice questions with a single correct answer for up to 1 AMA PRA Category 1 Credit™ each. Credit is issued only to subscribers of the online AJP CME Course Program.

See the list below for articles in this month's issue that are the subject of a CME quiz.

### In this issue

Racial Disparities in Adversity During Childhood and the False Appearance of Race-Related Differences in Brain Structure (Dumornay et al., p. 127)

Polygenic Risk and Social Support in Predicting Depression Under Stress (Cleary et al., p. 139)

Project Harmony: A Meta-Analysis With Individual Patient Data on Behavioral and Pharmacologic Trials for Comorbid Posttraumatic Stress and Alcohol or Other Drug Use Disorders (Hien et al., p. 155)

@APAPubJournals

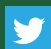

Psychiatry Online

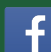

AMERICAN  
PSYCHIATRIC  
ASSOCIATION  
PUBLISHING

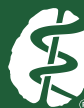

[www.appi.org](http://www.appi.org)  
1-800-368-5777  
[appi@psych.org](mailto:appi@psych.org)
